# Supplementary material
Source: PubMed Central journal article supplement (PMC3250134)
Supplement: 1116325108_pnas.201116325SI.pdf [file 1116325108_pnas.201116325SI.pdf]

# Supporting Information

Footitt et al. 10.1073/pnas.1116325108

## SI Materials and Methods

**Seed Production.** Seeds were produced (February–May 2007) in a temperature-controlled greenhouse. Heating and venting were set to provide a temperature of 16–18 °C during the 16-h day and 10–15 °C at night. Supplementary lighting (400 W high-pressure sodium lamps) (Osram) was supplied when light intensity fell below 300 W m<sup>2</sup> during the 16-h day. Nondormant seeds of the *Arabidopsis thaliana* ecotype Cape Verdi Isle (Cvi) were sown into compost (Levingtons F2/sand/vermiculite at a ratio of 6/1/1) in multicell trays held in capillary matting-lined seed trays. Mature seeds were harvested by hand threshing and equilibrated at 15% relative humidity/5 °C for 7 d to produce an equilibrium moisture content of 5–7% on a dry-weight basis. Seeds were stored at –80 °C in sealed tubes.

**Seed Burial.** To reduce seed mortality, seeds were dressed with Metalaxyl (Hockley International) at 1 g active fungicide/kg seeds (1). Seeds were then dispersed in Ballotini balls (100- to 250- $\mu$ m diameter) (Potters Ballotini) of the same particle size as the sand in the sandy loam soil in the field trial area at a density of 40 seeds/g of Ballotini balls in 125- $\mu$ m mesh nylon bags (Clarcor-UK) and sealed with a WeLoc Weland M. bag clip (size PA110). For each time point, one bag for physiological analysis and four bags for molecular analysis were buried at a depth of 5 cm in a random plot design. SM200 soil moisture sensors (Delta-T Devices) and Thermistore temperature probes (Betatherm) linked to a data logger (Delta-T Devices) recorded soil moisture and temperature at seed depth in dummy bags (2).

**Seed Recovery.** Samples for molecular analysis were recovered from the field in the dark. A light-proof box with sealed arm holes in the top was placed over the burial site, and the base was sealed with soil to exclude light. The samples were then exhumed and placed in a laminated foil bag (Moore and Buckle) sealed with a WeLoc PA150 clip. In the laboratory under a green safe light, seeds were immediately separated from the Ballotini balls in cold water to remove soil. Ballotini balls and seeds were transferred to a 50-mL centrifuge tube, allowed to settle, and then washed three times. Tubes were gently shaken, causing seeds to migrate over the Ballotini balls to the tube walls where they were removed with a pastette (3 mL) (Jencons) to 2-mL Eppendorf tubes and immediately frozen in liquid nitrogen and stored at –80 °C. Seeds for physiological analysis were separated from Ballotini balls in the light in a similar fashion as above and immediately used for dormancy testing.

**Dormancy Testing.** Seeds recovered for physiological analysis were surface-sterilized in a 0.125% sodium hypochlorite solution [household bleach (5% sodium hypochlorite) diluted to 2.5%] for 5 min and then washed three times in water. Although household bleach is an effective seed disinfectant, excessive exposure and high concentrations of it can break dormancy (3, 4). Using Ulipette BARKY CP-100 tips (Barkey Instruments International), 50 seeds were plated out in triplicate plates (124 × 88 × 22 mm) (Stewart Plastics). Each plate contained two sheets of Whatman 3MM chromatography paper and 8 mL of the appropriate solution. Plates were placed in sealable freezer bags and incubated at 20 °C under continuous light, and germination was scored at 2- to 3-d intervals for up to 28 d. Germination was recorded as the emergence of the radical through the seed coat. Nitrate sensitivity was tested by incubating seeds on 10 mM KNO<sub>3</sub> as above. Gibberellic acid (GA) sensitivity was tested by exposing seeds to

5–250  $\mu$ M GA in 1.7 mM citric acid/3.3 mM K<sub>2</sub>HPO<sub>4</sub> buffer at pH 5.0 as above.

Thermodormancy was tested on water as above at 5, 10, 15, 20, and 25 °C. Seed viability was also tested at 20 °C using 100  $\mu$ M GA/50  $\mu$ M fluridone (Apollo Scientific) in citrate/phosphate buffer (pH 5.0). Depth of dormancy was determined by dry afterripening seeds at 20 °C in the dark at an equilibrium moisture content of 55% relative humidity. Loss of dormancy was evaluated by periodic germination testing on water at 20 °C in the light. From the resulting afterripening curves, the depth of dormancy, or AR50, was determined as the time required in dry storage to remove dormancy in 50% of the population.

**Thermal Germination Window.** Using the thermodormancy data described above, the thermal germination window was determined for germination  $\geq$ 10%. The mean weekly air temperature was used as an indicator of soil surface temperature to establish a thermal baseline for germination as set by the environment. Germination  $\geq$ 10% at a temperature greater than or equal to the soil surface temperature indicates when the permissive temperature for germination equals or exceeds the thermal baseline. In this situation, germination is possible in the field on exposure to light.

**Seedling Emergence.** To evaluate seedling emergence in the field, four replicate 17.5-cm<sup>2</sup> rigid black pots (BHGS Horticultural) were buried leaving a 2-cm lip above the ground. The pots were filled with sterilized soil to 3 cm from the top. The soil surface was covered in 125- $\mu$ m nylon mesh to allow soil disturbance without incorporating seeds into deeper layers. A total of 500 seeds were then sown over the surface and covered in 1 cm of sterile soil. At monthly intervals, the soil was disturbed to expose seeds to light. Subsequent seedling emergence in each plot was recorded and seedlings were removed.

**Abscisic Acid Analysis.** The abscisic acid (ABA) content of three independent biological samples was determined at six time points covering the annual cycle. Hormone analysis used deuterated standards and analysis was by ultra performance liquid chromatography/electro spray ionization tandem mass spectroscopy (5–7) performed by the National Research Council Plant Biotechnology Institute, Saskatoon, Canada.

**Quantitative PCR.** RNA was extracted from seeds using the RNA-queous kit (Ambion) in conjunction with a plant RNA isolation aid (Ambion). RNA quality was determined using a spectrophotometer (Nanodrop) and electrophoretically with an Agilent Bioanalyzer. RNA was treated with RNase-free DNase I (Roche Diagnostics) to remove contaminating genomic DNA. Synthesis of cDNA was performed on 2  $\mu$ g total RNA using SuperScript II Reverse Transcriptase (Invitrogen) and random pentadecamer primers (Invitrogen) following the manufacturer's instructions. Quantitative RT-PCR was performed in 384-well plates with a LightCycler 480 Real-Time PCR instrument (Roche Diagnostics) using the LightCycler 480 SYBR Green I Master kit (Roche Diagnostics). The gene specific-primer pairs used are listed in Table S1. For *DOG1*, a universal primer pair was used to cover all splice variants (8). Of the genes evaluated for use as reference genes (9) that appear in our seed dormancy microarray data (10, 11), the housekeeping gene At4g34270 (Tip 4-like) had the lowest fold change in expression and coefficient of variation across 13 different dormancy states and was selected as the reference gene for normalization purposes. The data at each time point are derived from analysis in triplicate of three independent biological samples. Data were

normalized against an internal calibration curve (0–1/1,000 dilutions) of the gene of interest, and the reference gene at the time point was ascertained by PCR and array data to have the highest expression of the gene of interest. Reactions contained 5  $\mu$ L of SYBR Green I Master, 2  $\mu$ L PCR-grade water, 1  $\mu$ L of 10 mM

forward and reverse primers, and 1  $\mu$ L cDNA (diluted 1:10) in a final volume of 10  $\mu$ L. PCR was carried out under the following conditions: one cycle at 95  $^{\circ}$ C for 10 min followed by 50 cycles at 95  $^{\circ}$ C for 30 s, 65  $^{\circ}$ C for 30 s, and 72  $^{\circ}$ C for 30 s. Data were analyzed using LightCycler 480 software, version 1.5 (Roche Diagnostics).

1. Van Mourik TA, Stomph TJ, Murdoch AJ (2005) Why high seed densities within buried mesh bags may overestimate depletion rates of soil seed banks. *J Appl Ecol* 42:299–305.
2. Footitt S, Finch-Savage WE (2011) Production of seed samples for the effective molecular analysis of dormancy cycling in Arabidopsis. *Seed Dormancy: Methods and Protocols*, ed Kermode AR (Humana Press, London), pp 65–79.
3. Chun SC, Schneider RW, Cohn MA (1997) Sodium hypochlorite: Effect of solution pH on rice seed disinfestation and its direct effect on seedling growth. *Plant Dis* 81: 821–824.
4. Hsiao AI, Quick WA (1984) Actions of sodium-hypochlorite and hydrogen-peroxide on seed dormancy and germination of wild oats, *Avena-fatua* L. *Weed Res* 24:411–419.
5. Abrams SR, Nelson K, Ambrose SJ (2003) Deuterated abscisic acid analogs for mass spectrometry and metabolism studies. *J Labelled Comp Radiopharm* 46:273–283.
6. Ross ARS, et al. (2004) Determination of endogenous and supplied deuterated abscisic acid in plant tissues by high-performance liquid chromatography-electrospray ionization tandem mass spectrometry with multiple reaction monitoring. *Anal Biochem* 329:324–333.
7. Zaharia LI, Galka MM, Ambrose SJ, Abrams SR (2005) Preparation of deuterated abscisic acid metabolites for use in mass spectrometry and feeding studies. *J Labelled Comp Radiopharm* 48:435–445.
8. Bentsink L, Jowett J, Hanhart CJ, Koornneef M (2006) Cloning of DOG1, a quantitative trait locus controlling seed dormancy in Arabidopsis. *Proc Natl Acad Sci USA* 103: 17042–17047.
9. Remans T, et al. (2008) Normalisation of real-time RT-PCR gene expression measurements in Arabidopsis thaliana exposed to increased metal concentrations. *Planta* 227:1343–1349.
10. Cadman CSC, Toorop PE, Hilhorst HWM, Finch-Savage WE (2006) Gene expression profiles of Arabidopsis Cvi seeds during dormancy cycling indicate a common underlying dormancy control mechanism. *Plant J* 46:805–822.
11. Finch-Savage WE, Cadman CSC, Toorop PE, Lynn JR, Hilhorst HWM (2007) Seed dormancy release in Arabidopsis Cvi by dry after-ripening, low temperature, nitrate and light shows common quantitative patterns of gene expression directed by environmentally specific sensing. *Plant J* 51:60–78.

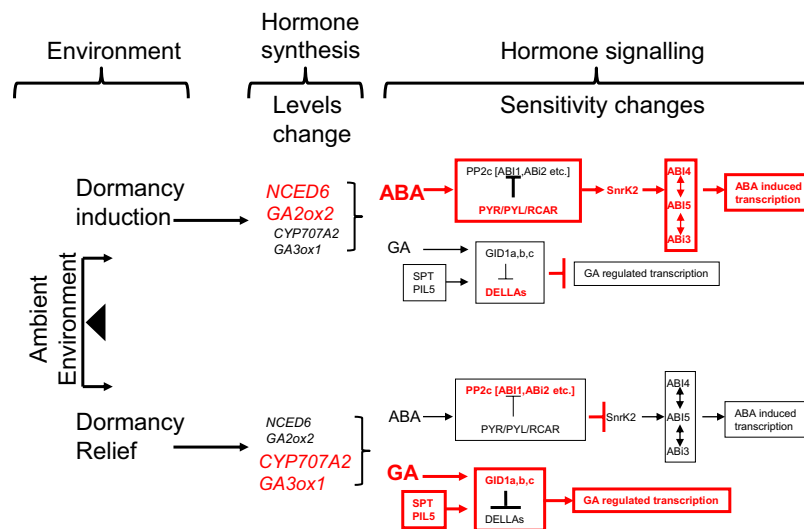

**Fig. S1.** A schematic summary of ABA and GA metabolism and signaling genes implicated in the regulation of seed dormancy where environmental signals influence the relative balance of dormancy induction and relief. When induction or relief are induced, the pathways indicated in red dominate. Active GA levels increase just before radical emergence, suggesting that it plays a key role in the regulation of germination; the key stages of GA metabolism during this process have been described (1). GA3-oxidase is responsible for the final step in GA biosynthesis to produce active GAs. Subsequent degradation is via GA2-oxidase. Key genes responsible for ABA biosynthesis, degradation, and conjugation during *Arabidopsis* seed germination have been identified and investigated (e.g., 2–6). NCEDs are the primary regulatory step in ABA synthesis; subsequent inactivation is by hydroxylation (CYP707) or conjugation with sugars (7). The balance of these processes regulates ABA content. Hormone signaling, especially that resulting from the dynamic balance of the hormones abscisic acid (ABA) and gibberellic acid (GA), is a key component of the interacting networks regulating germination (4, 8). Understanding of ABA signal transduction is developing rapidly, and a model has recently emerged in which PYR/PYL/RCAR receptors bind to ABA to remove the repression by PP2cs of downstream signaling via SnRK2s to ABRE-binding transcription factors (ABI3, ABI4, ABI5) (9). On the other side of this balance, DELLA proteins repress GA responses and therefore germination potential (10). DELLAs are degraded to remove this repression on forming a complex with GA and GID1 receptors (11). These signaling pathways are influenced by a diverse range of environmental signals as germination potential increases, principally temperature and light. Key components of the interaction between these environmental signals and GA are the two phytochrome-interacting bHLH transcription factors, PIL5 and SPT. Both factors repress germination potential in the dark and at low temperature, respectively. PIL5 represses cell-wall-modifying genes similar to the DELLAs. It also represses GA3ox1 and CYP707A2 and enhances GA2ox1, NCED6, and DELLA expression, whereas SPT represses GA3ox1 expression (12, 13). PIL5 and SPT in turn are inactivated by DELLAs (RGL2 and RGA2) (13). PIF proteins are released when the GID protein–GA complex binds DELLA proteins to target their degradation by the proteasome (14).

1. Ogawa M, et al. (2003) Gibberellin biosynthesis and response during Arabidopsis seed germination. *Plant Cell* 15:1591–1604.
2. Penfield S, Li Y, Gilday AD, Graham S, Graham IA (2006) Arabidopsis ABA INSENSITIVE4 regulates lipid mobilization in the embryo and reveals repression of seed germination by the endosperm. *Plant Cell* 18:1887–1899.
3. Okamoto M, et al. (2006) CYP707A1 and CYP707A2, which encode abscisic acid 8'-hydroxylases, are indispensable for proper control of seed dormancy and germination in Arabidopsis. *Plant Physiol* 141:97–107.
4. Holdsworth MJ, Bentsink L, Soppe WJJ (2008) Molecular networks regulating Arabidopsis seed maturation, after-ripening, dormancy and germination. *New Phytol* 179:33–54.
5. Müller K, Tintelnot S, Leubner-Metzger G (2006) Endosperm-limited Brassicaceae seed germination: Abscisic acid inhibits embryo-induced endosperm weakening of *Lepidium sativum* (cress) and endosperm rupture of cress and Arabidopsis thaliana. *Plant Cell Physiol* 47:864–877.
6. Piskurewicz U, et al. (2008) The gibberellic acid signaling repressor RGL2 inhibits Arabidopsis seed germination by stimulating abscisic acid synthesis and ABI5 activity. *Plant Cell* 20: 2729–2745.
7. Nambara E, et al. (2010) Abscisic acid and the control of seed dormancy and germination. *Seed Sci Res* 20:55–67.

8. Kucera B, Cohn MA, Leubner-Metzger G (2005) Plant hormone interactions during seed dormancy release and germination. *Seed Sci Res* 15:281–307.
9. Cutler SR, Rodriguez PL, Finkelstein RR, Abrams SR (2010) Abscisic acid: Emergence of a core signaling network. *Annu Rev Plant Biol* 61:651–679.
10. Sun TP, Gubler F (2004) Molecular mechanism of gibberellin signaling in plants. *Annu Rev Plant Biol* 55:197–223.
11. Hartweck LM (2008) Gibberellin signaling. *Planta* 229:1–13.
12. Penfield S, et al. (2005) Cold and light control seed germination through the bHLH transcription factor SPATULA. *Curr Biol* 15:1998–2006.
13. Oh E, et al. (2009) Genome-wide analysis of genes targeted by PHYTOCHROME INTERACTING FACTOR 3-LIKE5 during seed germination in Arabidopsis. *Plant Cell* 21:403–419.
14. Davière JM, de Lucas M, Prat S (2008) Transcriptional factor interaction: A central step in DELLA function. *Curr Opin Genet Dev* 18:295–303.

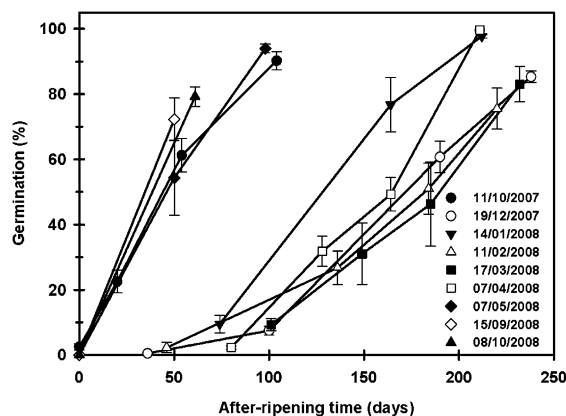

Fig. 52. Mean dry afterripening times of seeds from four independent biological replicates before burial (11/10/2007) and when recovered from the field at intervals where the time to afterripening in 50% of the population was greater than zero. Data represent the mean  $\pm$  SEM ( $n = 4$ ).

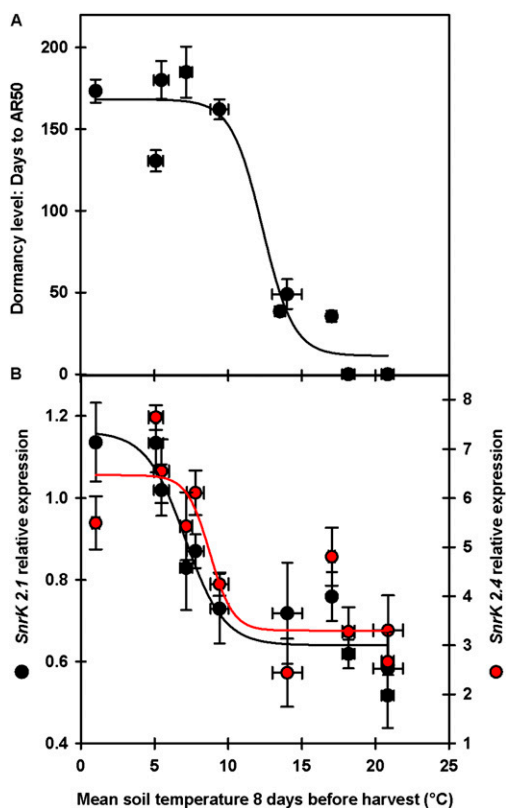

Fig. 53. The impact of soil temperature on dormancy level and the expression of *SnrK2.1* and *-2.4* in seeds recovered from the field. (A) Dormancy level in the field is strongly influenced by soil temperature (Fig. 1A). Here dormancy is seen to be strongly influenced by the cumulative effect of low and high temperature. As a result, dormancy increases as mean soil temperature decreases in the winter and decreases as mean soil temperature increases in late spring/early summer with a rapid transition zone between 9 and 14 °C. [AR50 regression curve is  $y = 11.2840 + 156.8227/(1 + \exp(-(x - 12.3329)/-1.0577))$ ;  $R^2 = 0.946$ .] (B) A strong relationship was seen between mean soil temperature and the expression of *SnrK2.1* and *-2.4* (Figs. 1A and 2B) where the relationship is seen to be almost linear between 5 and 10 °C. [*SnrK2.1* regression curve is  $y = 0.64 + 0.523/(1 + \exp(-(x - 0.708)/-1.32))$ ,  $R^2 = 0.890$ ; *SnrK2.4* regression curve is  $y = 3.297 + 3.171/(1 + \exp(-(x - 8.76)/-0.783))$ ;  $R^2 = 0.776$ .]



## Other Supporting Information Files

[Dataset S1 \(XLSX\)](#)

[Dataset S2 \(XLSX\)](#)
